# Supplementary material
Source: PubMed Central journal article supplement (PMC2614477)
Supplement: NIHMS80598-supplement-01.pdf [file NIHMS80598-supplement-01.pdf]

**Supplementary Material**  
for  
**The Structure of Urease Activation Complexes Examined by Flexibility**  
**Analysis, Mutagenesis, and Small-Angle X-Ray Scattering**

by

Soledad Quiroz, Sai Chetan K. Sukuru, Robert P. Hausinger, Leslie A. Kuhn, William T.

Heller

**Table S1**

Polar Interactions of Region 1 (UreB residues 2 – 8)

| <b>Residue 1</b> | <b>Donor Atom</b> | <b>Residue 2</b> | <b>Acceptor Atom</b> | <b>Energy (Kcal/mol)</b> |
|------------------|-------------------|------------------|----------------------|--------------------------|
| UreB Gly4        | N                 | UreC Ala24       | O                    | -2.73                    |
| UreC Lys20       | N                 | UreB His7        | O                    | -3.62                    |
| UreB His7        | N                 | UreC Lys20       | O                    | -4.58                    |
| UreC Arg22       | N                 | UreB Glu5        | O                    | -6.52                    |
| UreC Arg22       | NH1               | UreB Glu5        | OE2                  | -8.11                    |

**Table S2**

Hydrophobic Interactions of Region 1 (UreB residues 2 – 8)

| <b>Residue 1</b> | <b>Atom 1</b> | <b>Residue 2</b> | <b>Atom 2</b> |
|------------------|---------------|------------------|---------------|
| UreB Glu5        | CG            | UreC Trp29       | CH2           |
| UreB Tyr6        | CD1           | UreC Val21       | CG2           |
| UreB His7        | CB            | UreC Trp29       | CZ3           |
| UreB Val8        | CG1           | UreC Arg6        | CB            |
| UreB Val8        | CG2           | UreC Ala10       | CB            |

**Table S3**

Polar Interactions of Region 2 (UreB residues 11 – 19)

| <b>Residue 1</b> | <b>Donor Atom</b> | <b>Residue 2</b> | <b>Acceptor Atom</b> | <b>Energy (Kcal/mol)</b> |
|------------------|-------------------|------------------|----------------------|--------------------------|
| UreC Arg6        | N                 | UreB Gly11       | O                    | -3.45                    |
| UreC Ile4        | N                 | UreB Ile13       | O                    | -4.53                    |
| UreB Leu15       | N                 | UreC Ser2        | O                    | -4.73                    |
| UreB Asn16       | N                 | UreC Tyr39       | O                    | -4.87                    |
| UreB Ile13       | N                 | UreC Ile4        | O                    | -7.18                    |
| UreB Arg19       | NH2               | UreC Glu41       | OE2                  | -7.34                    |
| UreB Arg19       | NH1               | UreC Glu41       | OE2                  | -8.88                    |

**Table S4**

Hydrophobic Interactions of Region 2 (UreB residues 11 – 19)

| <b>Residue 1</b> | <b>Atom 1</b> | <b>Residue 2</b> | <b>Atom 2</b> |
|------------------|---------------|------------------|---------------|
| UreB Ile13       | CB            | UreC Ile4        | CG2           |
| UreB Ile13       | CG2           | UreC Tyr39       | CG            |

**Table S5**

Polar Interactions of Region 3 (UreB residues 20 – 101)

| <b>Residue 1</b> | <b>Donor Atom</b> | <b>Residue 2</b> | <b>Acceptor Atom</b> | <b>Energy (Kcal/mol)</b> |
|------------------|-------------------|------------------|----------------------|--------------------------|
| UreB His39       | NE2               | UreC Glu41       | OE2                  | -1.03                    |
| UreB Arg60       | NH2               | UreC Glu41       | OE1                  | -1.43                    |
| UreB Arg60       | NE                | UreC Glu41       | OE2                  | -1.84                    |
| UreC Lys49       | NZ                | UreB Gly66       | O                    | -2.11                    |
| UreB His87       | N                 | UreC Pro102      | O                    | -2.20                    |
| UreB Ala85       | N                 | UreC Ile104      | O                    | -2.84                    |
| UreB Ala89       | N                 | UreC Asp103      | O                    | -3.09                    |
| UreB His87       | ND1               | UreC Asp103      | OD1                  | -4.27                    |
| UreB His39       | NE2               | UreC Glu41       | OE1                  | -8.55                    |
| UreB Arg60       | NH2               | UreC Glu41       | OE2                  | -8.98                    |

**Table S6**

Hydrophobic Interactions of Region 3 (UreB residues 20 – 101)

| <b>Residue 1</b> | <b>Atom 1</b> | <b>Residue 2</b> | <b>Atom 2</b> |
|------------------|---------------|------------------|---------------|
| UreB Tyr40       | CD2           | UreC Met55       | CE            |
| UreB Phe84       | CG            | UreC Ile104      | CG2           |
| UreB Phe84       | CD1           | UreC Ile104      | CB            |
| UreB Phe84       | CE1           | UreC Ile104      | CD1           |
| UreB Phe91       | CB            | UreC Gln59       | CG            |
| UreB Phe93       | CE1           | UreC Met55       | CE            |
| UreB Phe93       | CE1           | UreC Met55       | SD            |
| UreB Phe93       | CE1           | UreC Met55       | CG            |
| UreB Phe93       | CZ            | UreC Met55       | CG            |

A

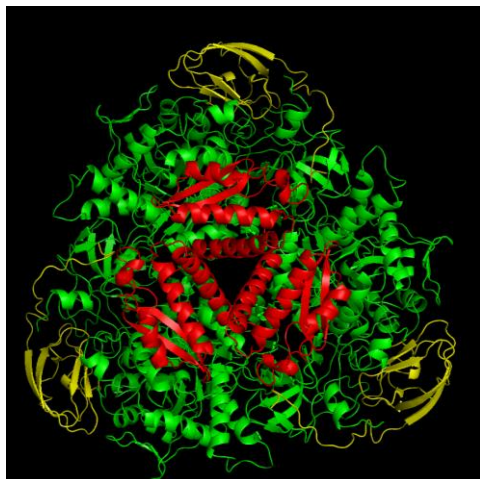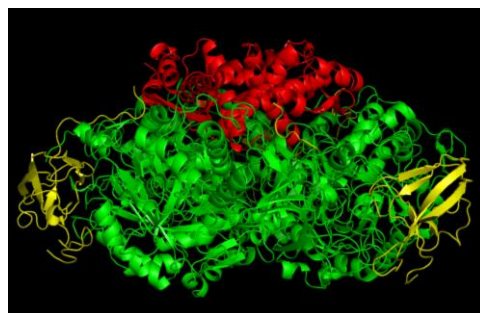

B

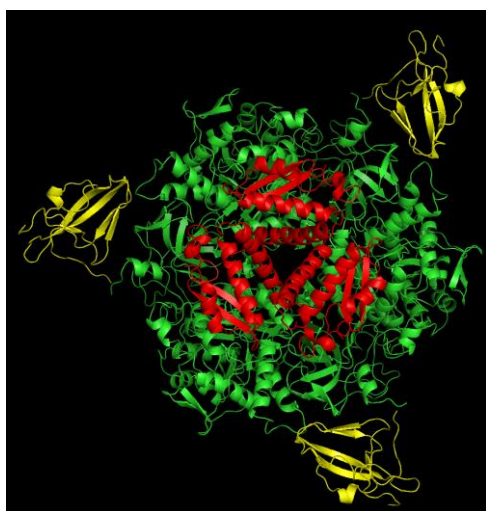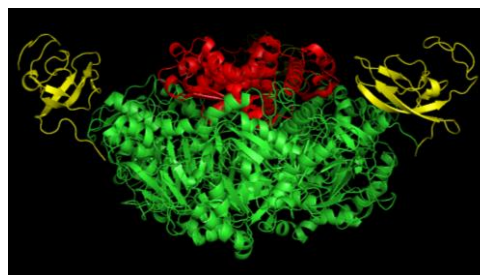

C

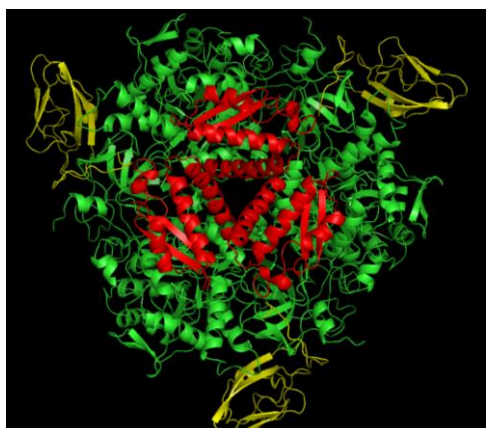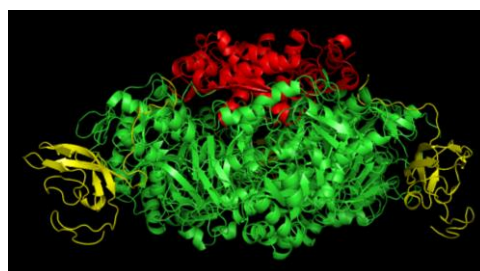

**Fig. S1.** Two views of (A) the native conformation of urease, (B) UreB conformation 1 (torsionally adjusted UreB Gly11 and Gly18 residues), and (C) UreB conformation 2 (severed linker, docked domain, and reconnected linker). UreA is depicted in red, UreB in yellow, and UreC in green.

A

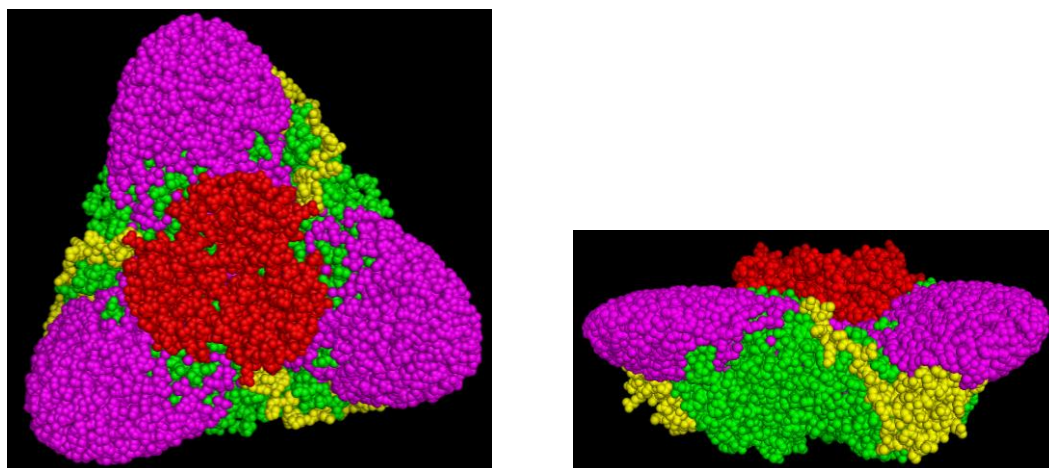

B

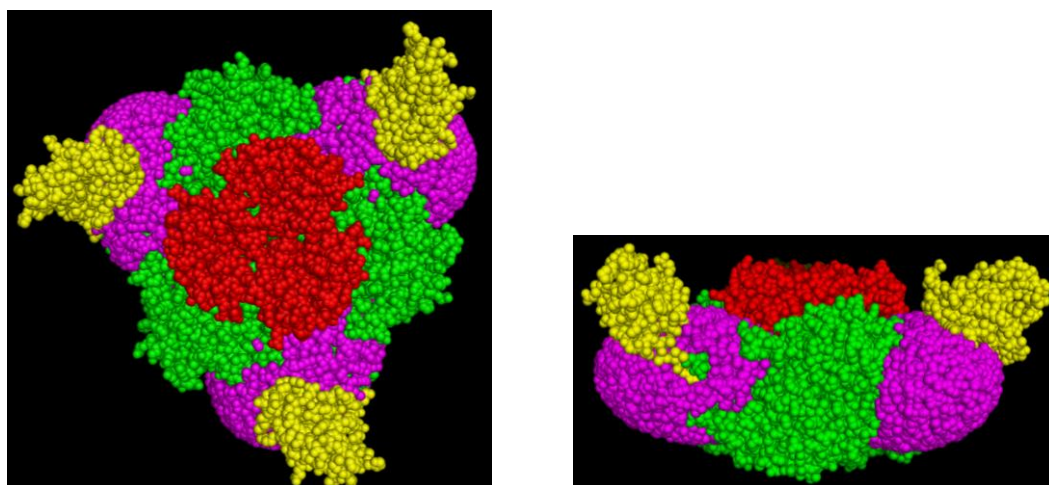

C

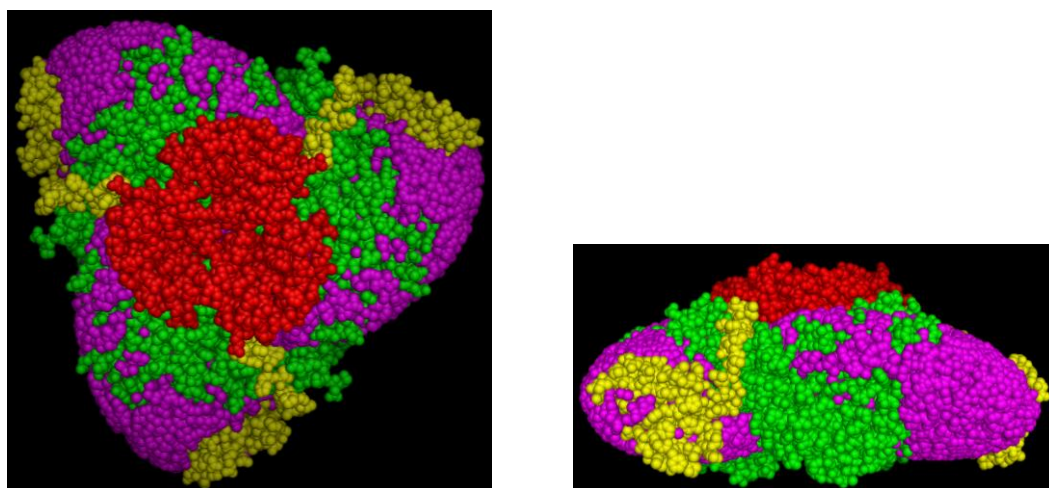

**Fig. S2.** Two views in space-filling representation of the best models of  $(\text{UreABC-UreD})_3$  generated by adding ellipsoids for UreD to the (A) native urease conformation, (B) UreB conformation 1, and (C) UreB conformation 2. UreA is depicted in red, UreB in yellow, UreC in green, and UreD in magenta.



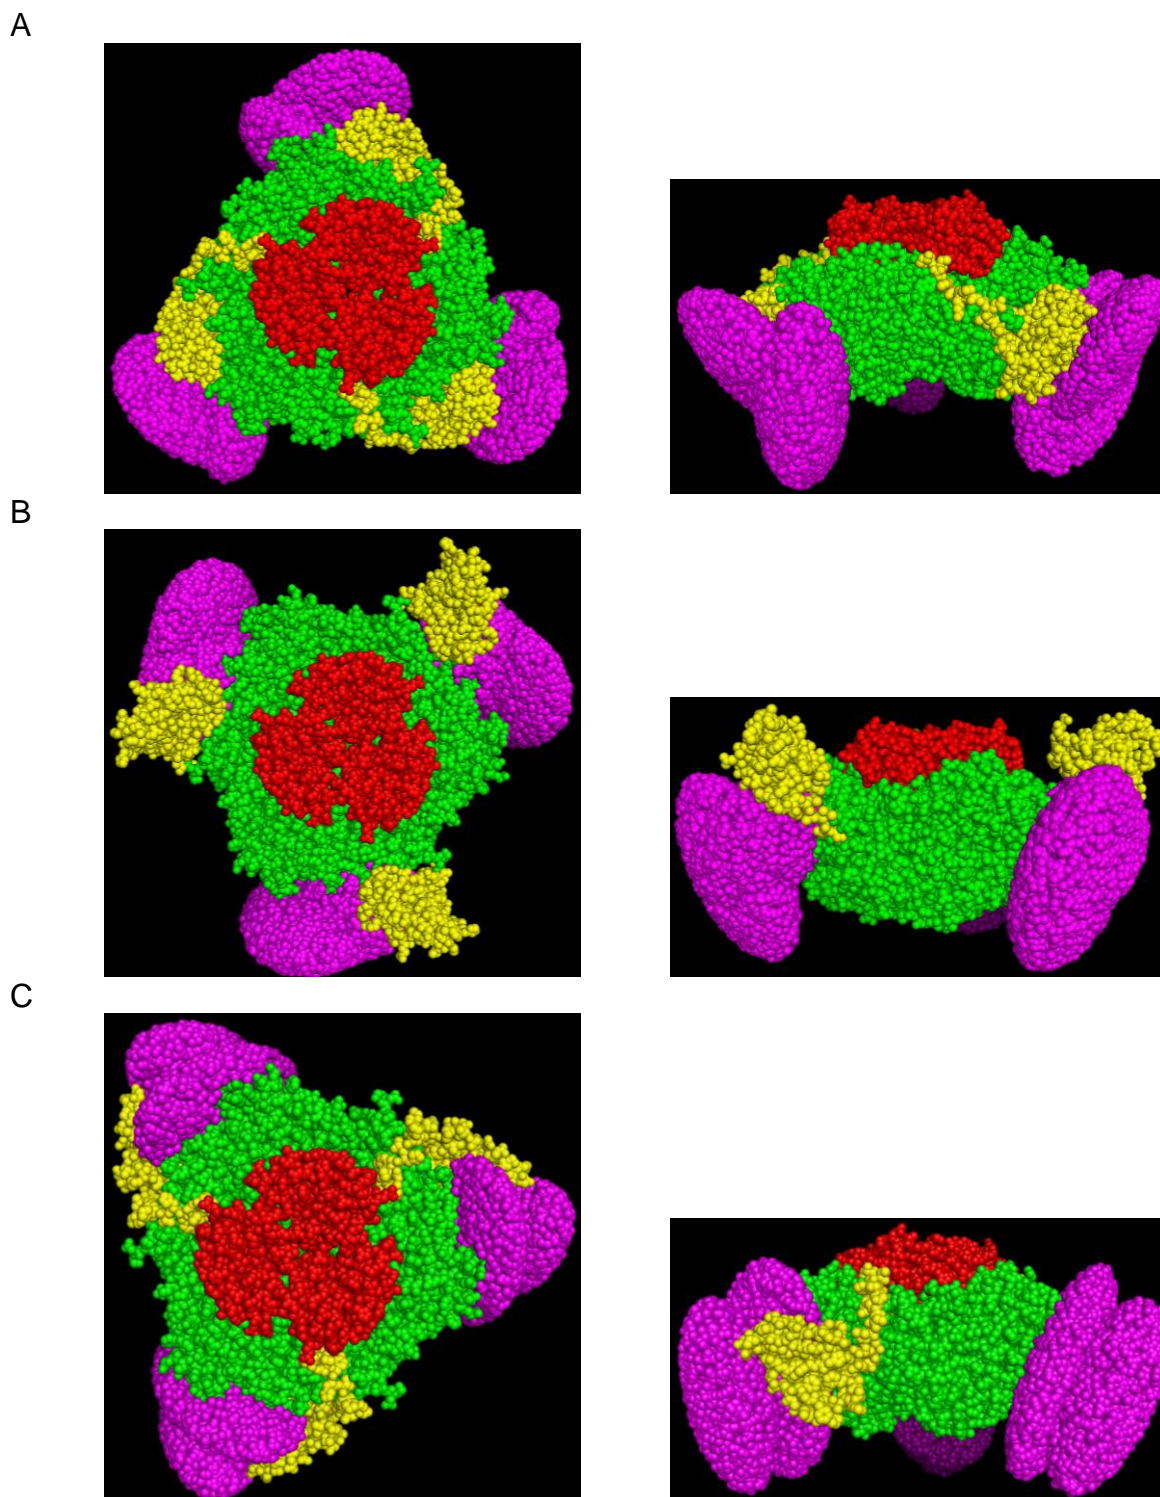

**Fig. S3.** Two views of space-filling representation of the best models of  $(\text{UreABC-UreDF})_3$  generated by adding ellipsoids for UreD and UreF to the (A) native urease conformation, (B) UreB conformation 1, and (C) UreB conformation 2. UreA is shown in red, UreB in yellow, UreC in green, and both UreD and UreF (because the shapes cannot be distinguished by SAXS) are shown in magenta.
